# Supplementary material
Source: publisher site journal article supplement (https://www.dovepress.com/get_supplementary_file.php?f=357086.docx)
Supplement: Supplementary file 1 [file get_supplementary_file.php]

**Annual and post-exacerbation follow-up of asthma patients in clinical practice – a large population-based study in Sweden**

**Supplementary data**

**Supplementary Figure 1.** Study Design


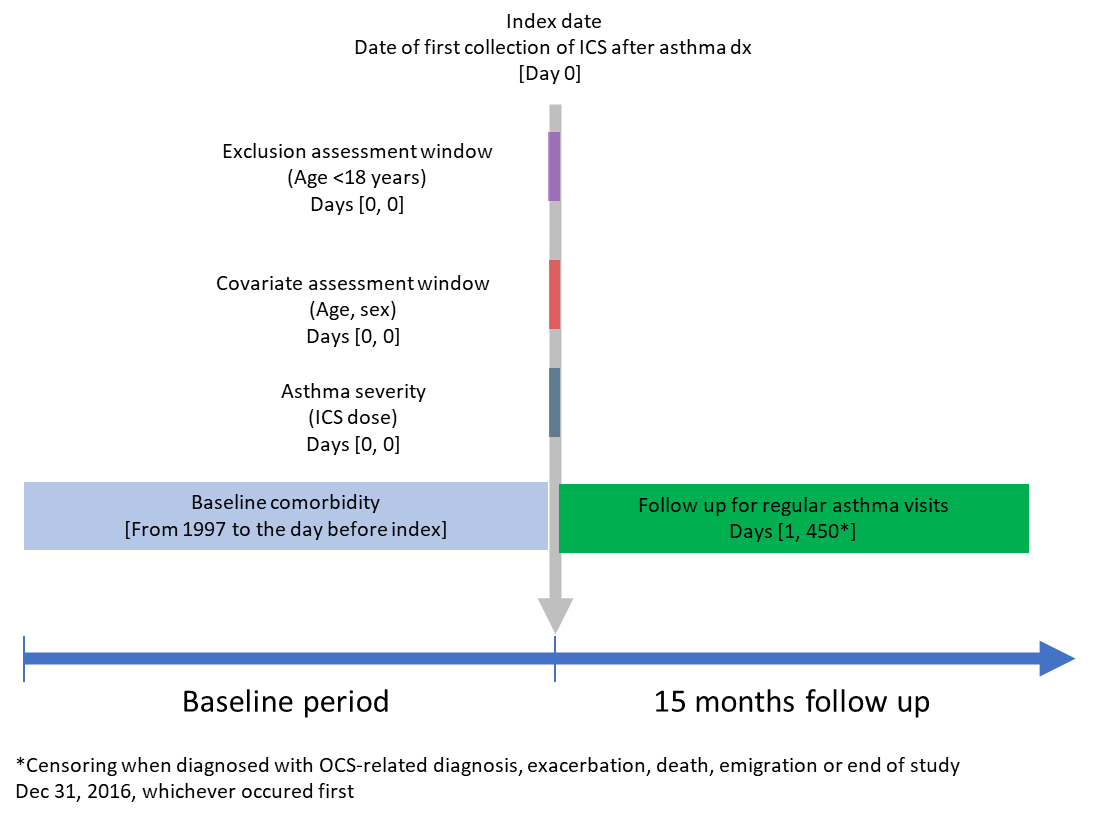


**Supplemental Table 1.** Medication and diagnoses codes

| **Medication** | **ATC-code** |
| --- | --- |
| ICS | R03BA |
| ICS/LABA combinations | R03AK06-08, 10-11 |
| ICS/LABA/LAMA combinations | R03AL08-09 |
| LABA | R03AC12-13, 18-19, R03CC12 |
| LAMA | R03AL03-07 |
| SABA | R03AC02-03 |
| Leukotriene modifiers | R03DC03 |
| Methylxanthines | R03DA04-05 |
| PD4 antagonists | R03DX07 |
| N-acetylcysteine | R05CB01 |
| Nasal corticosteroids | R01AD01, 05, 08-09, 11-12, 58 |
| OCS | H02AB01-02, 04, 06-09 |
|  |  |
| **Diagnoses** | **ICD-10 code** |
| Asthma | J45-46 |
| Chronic rhinitis | J31 |
| Nasal polyps | J33 |
| Acute lower respiratory tract infections | J20-J22 |
| Chronic bronchitis | J40-J42 |
| COPD | J44 |
| Pneumonia | J11-J18 |
| Acute upper respiratory tract infections | J00-J06 |
| Hypertension | I10-I15 |
| Allergies | J30.1-J30.4 |
| Dermatitis and eczema | L20-L30 |
| Depression | F32 |
| Malignant neoplasm | C00-C97 |
| Diabetes, type 2 | E11 |
| Ischaemic heart disease | I20-I25 |
| Heart Failure | I50 |
| Osteoporosis | M82 |
| Chron’s disease | K50 |
| Ulcerative colitis | K51 |
| Rheumaroid arthritis | M05 |
| Polymyalgia rheumatica | M35.3 |

**Supplemental Table 2.** Incidence rate ratios (IRR) of asthma follow-up visits up to 15 months after index date

|  | **IRR (95% CI)** |
| --- | --- |
| Gender |  |
| Males | 1.00 (ref) |
| Females | 1.09 (1.05-1.13) |
| Calendar year (cont,) | 1.09 (1.09-1.10) |
| Age at index (years) |  |
| 18-34 | 1.00 (ref) |
| 35-49 | 1.09 (1.04-1.13) |
| 50-64 | 1.11 (1.06-1.16) |
| 65+ | 1.16 (1.10-1.21) |
| Negative binomial regression model | |
